# Supplementary material for: Small functionalized iron oxide nanoparticles for dual brain magnetic resonance imaging and fluorescence imaging
Source: Royal Society of Chemistry journal article supplement (doi:10.1039/d0ra10392f), 2021-01-01
Supplement: d0ra10392f1.pdf [file d0ra10392f1.pdf]

## Electronic Supplementary Information

### **Small Functionalized Iron Oxide Nanoparticles for Dual Brain Magnetic Resonance Imaging and Fluorescence Imaging**

Ruixue Wei,<sup>\*a</sup> Yang Liu,<sup>a</sup> Jinhao Gao,<sup>b</sup> V. Wee Yong,<sup>c</sup> and Mengzhou Xue<sup>\*a</sup>

<sup>a</sup>Department of Cerebrovascular Diseases, The Second Affiliated Hospital of Zhengzhou University, Zhengzhou 450052, Henan, China

<sup>b</sup>State Key Laboratory of Physical Chemistry of Solid Surfaces, The MOE Laboratory of Spectrochemical Analysis & Instrumentation, and The Key Laboratory for Chemical Biology of Fujian Province, College of Chemistry and Chemical Engineering, Xiamen University, Xiamen 361005, China.

<sup>c</sup>Hotchkiss Brain Institute and Department of Clinical Neurosciences, University of Calgary, Calgary, Alberta, Canada

\*Author for correspondence:

Mengzhou Xue, MD, PhD, 2 Jingba Road, Zhengzhou, Henan, China, 450001

E-mail: [xuemengzhou@zzu.edu.cn](mailto:xuemengzhou@zzu.edu.cn)

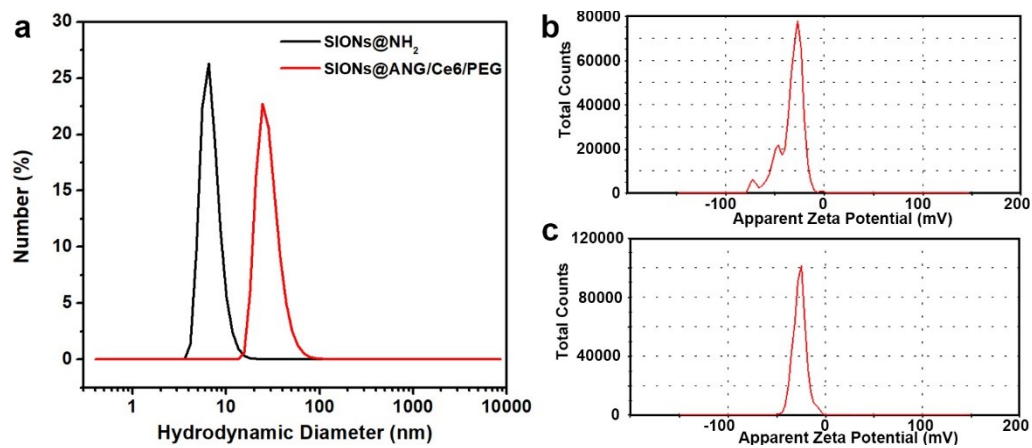

**Figure S1** (a) Hydrodynamic diameter of SIONs@NH<sub>2</sub> and SIONs@ANG/Ce6/PEG. Zeta potential in PBS (1×, pH 7.4) of (b) SIONs@NH<sub>2</sub> and (c) SIONs@ANG/Ce6/PEG.

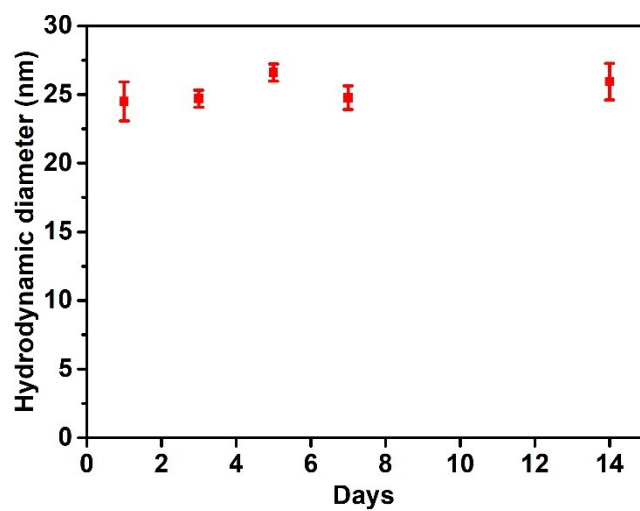

**Figure S2** Hydrodynamic diameter of SIONs@ANG/Ce6/PEG in 10% (v/v) fetal bovine serum (FBS) solution at different time points.

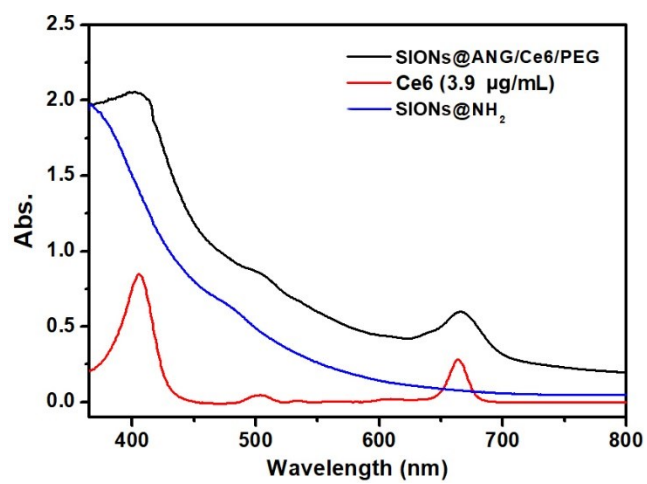

**Figure S3** UV-vis spectra of SIONs@ANG/Ce6/PEG, Ce6, and SIONs@NH<sub>2</sub>.

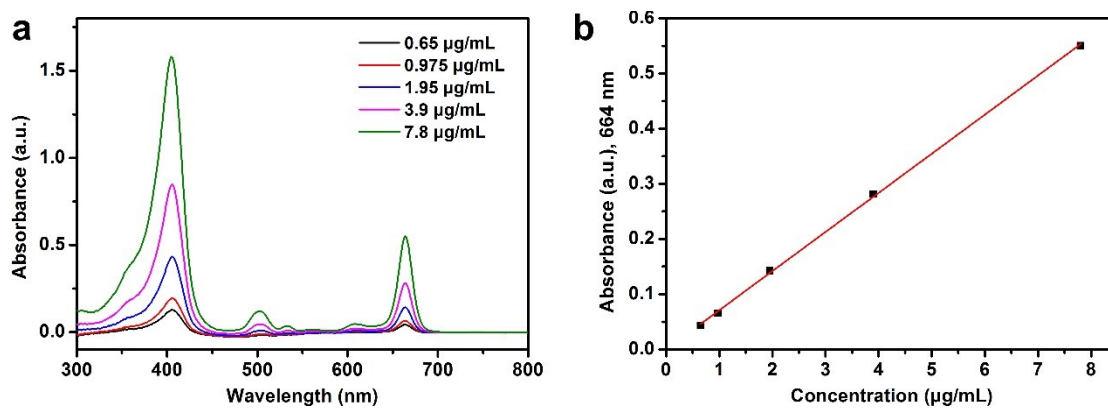

**Figure S4** (a) UV-Vis spectra of Ce6 at different concentrations. (b) Calibration curve of Ce6 based on (a).

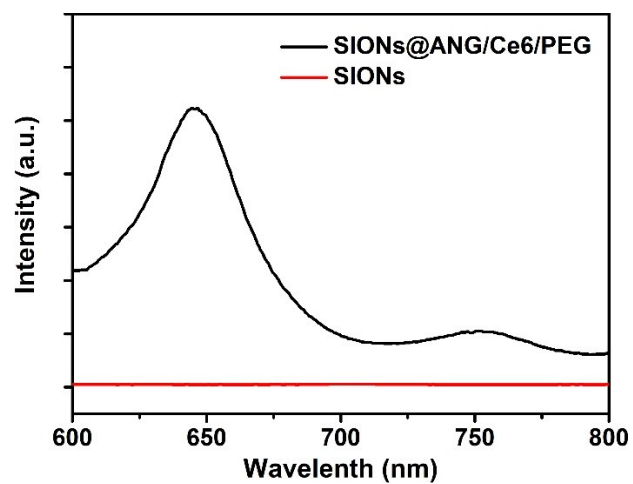

**Figure S5** Fluorescence spectrum of SIONs and SIONs@ANG/Ce6/PEG with excitation at 590 nm.

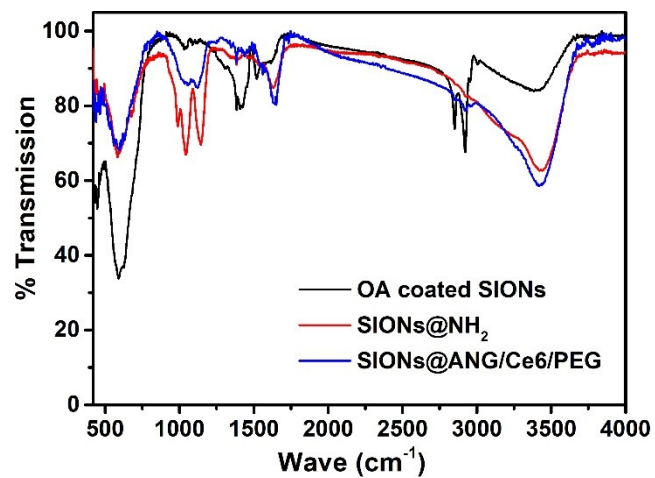

**Figure S6** Fourier transform infrared (FT-IR) spectra of OA coated SIONs, SIONs@NH<sub>2</sub>, and SIONs@ANG/Ce6/PEG.

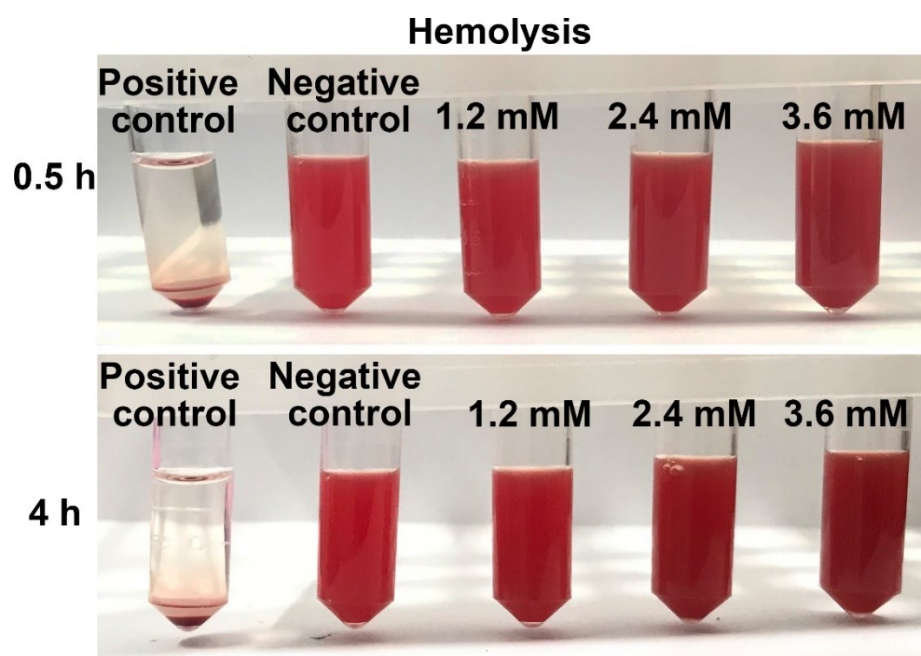

**Figure S7** Hemolysis test of SIONs. The diluted red blood cells were exposed to SIONs at a concentration gradient and no significant hemolysis effect were observed at even 3.6 mM [Fe] till 4 h incubation.



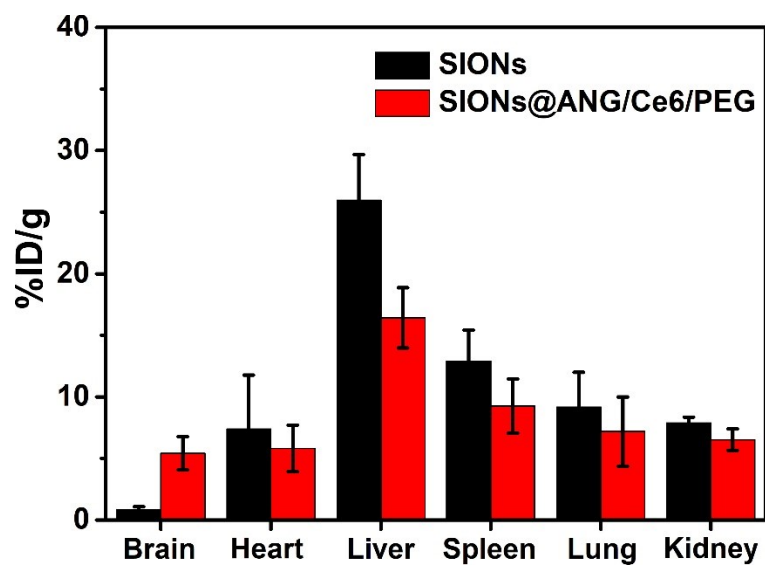

**Figure S8** Biodistribution of SIONs and SIONs@ANG/Ce6/PEG in mice organs at 2 h after intravenous injection (20 mg Fe /kg body weight,  $n = 3$ /group). The iron contents were measured by ICP-MS and the background was subtracted.
